# Supplementary material
Source: Springer Nature journal article supplement (https://www.springermedizin.de/resource/supplementary/12880_2013_214_MOESM4_ESM.pdf/9450316)

**a. Original RGB Image**

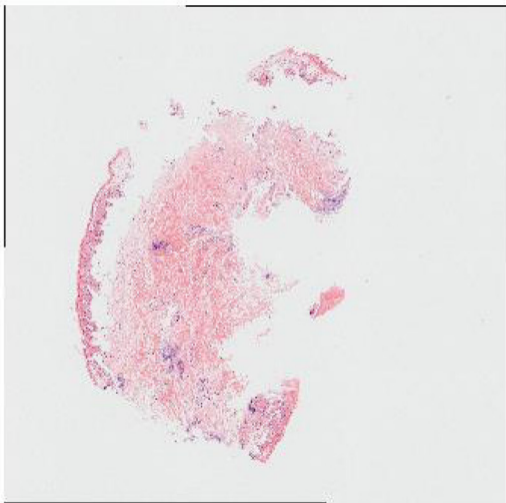

**b. Cropped RGB Image**

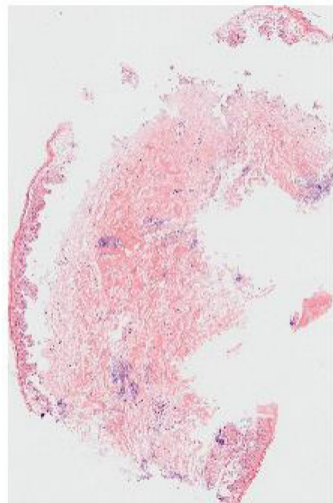

Supplement: MOESM4 [file 9450316]
